# Supplementary material
Source: Springer Nature journal article supplement (https://www.springermedizin.de/resource/supplementary/13049_2009_165_MOESM1_ESM.pdf/9666012)
Supplement: MOESM1 [file 9666012]

# Burn patients ICU admitted

n=50 (100%)

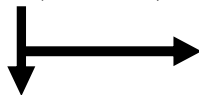

ICU non-survivors  
n=22 (44%)

**Burn patients ICU discharged**  
n=28 (56%)

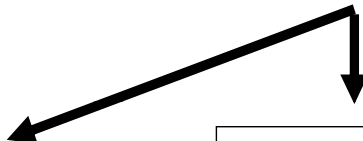

Hospital non-survivors  
n=5 (10%)

Hospital survivors  
n=23 (46%)

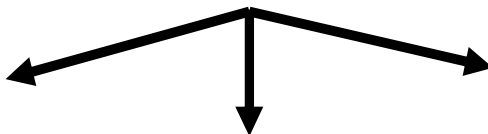

Dead during follow-up  
n=2 (4%)

**One year post-ICU discharge survivors**  
n=19 (38%)  
**INTERVIEWED**

Lost to follow-up  
n=2 (4%)
